# Supplementary material
Source: publisher figshare collection journal article supplement (https://karger.figshare.com/ndownloader/files/20225601)
Supplement: Supplementary file 1 [file 20225601]

**Online supplement 2.** International 10/20 system for EEG recording


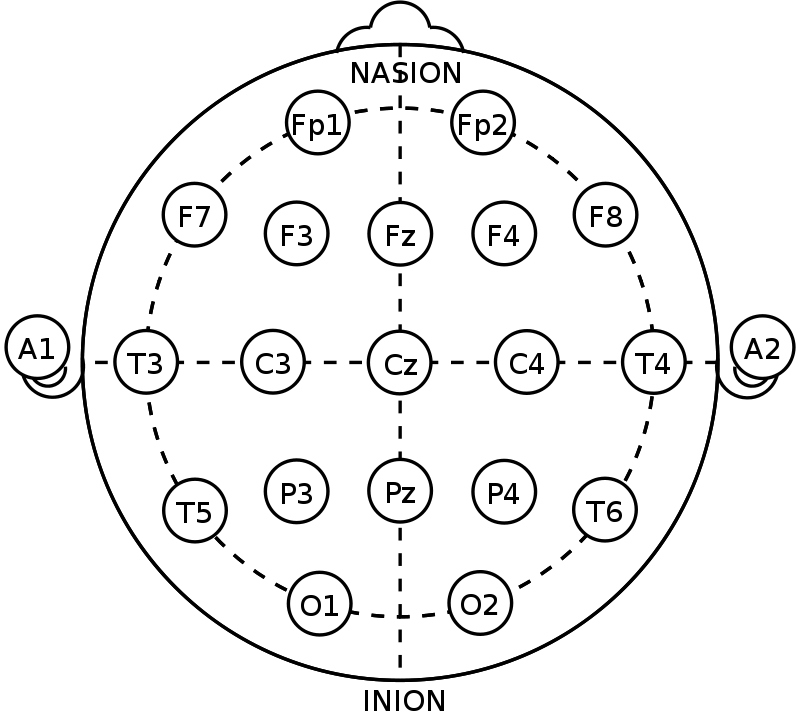


An electroencephalogram (EEG) was recorded from all participants from the above-depicted electrodes. Except for EEG, electrocardiogram and electromyogram were also recorded. All participants were recorded over 30 minutes during a quiet rest period, and underwent the required basic EEG recordings, including open eyes, closed eyes, and quiet status. Whether the epileptiform discharge occurred in each participant was determined by two independent, experienced EEG professional technicians of the neurophysiology lab of the Department of Neurology, Xuanwu Hospital, Capital Medical University, Beijing, China.
